# Supplementary material for: Impacts of different plant functional types on ambient ozone predictions in the Seoul Metropolitan Areas (SMAs), Korea
Source: Copernicus journal article supplement (doi:10.5194/acp-14-7461-2014), 2014-07-22
Supplement: Supplementary file [file acp-14-7461-2014-supplement.pdf]

Supplement of Atmos. Chem. Phys., 14, 7461–7484, 2014  
<http://www.atmos-chem-phys.net/14/7461/2014/>  
doi:10.5194/acp-14-7461-2014-supplement  
© Author(s) 2014. CC Attribution 3.0 License.

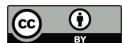

*Supplement of*

## **Impacts of different plant functional types on ambient ozone predictions in the Seoul Metropolitan Areas (SMAs), Korea**

**H.-K. Kim et al.**

*Correspondence to:* J.-H. Woo (woojh21@gmail.com)

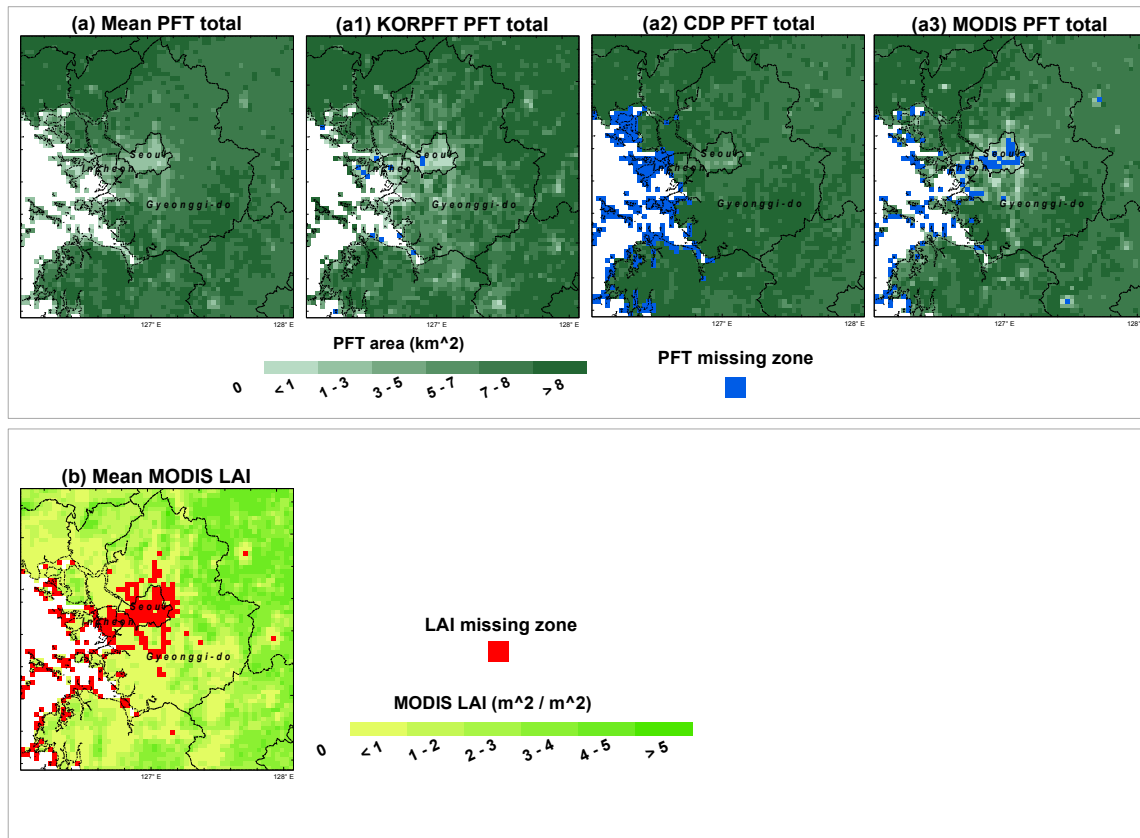

1

2 Figure S1. Spatial distribution of the PFT area for each PFT scenario and MODIS LAI. The mean spatial distributions for PFT total (i.e. sum  
 3 of BT, NT, SB and HB areas) were derived by averaging the three different distribution data sources (i.e., KORPFT, CDP and MODIS). The  
 4 mean MODIS LAI spatial distributions were derived by averaging the raw MODIS LAI values for the consecutive period of April to July  
 5 2008. It should be noted that the MODIS LAI values shown at Fig. S1(b) is not the LAI<sub>v</sub> values.

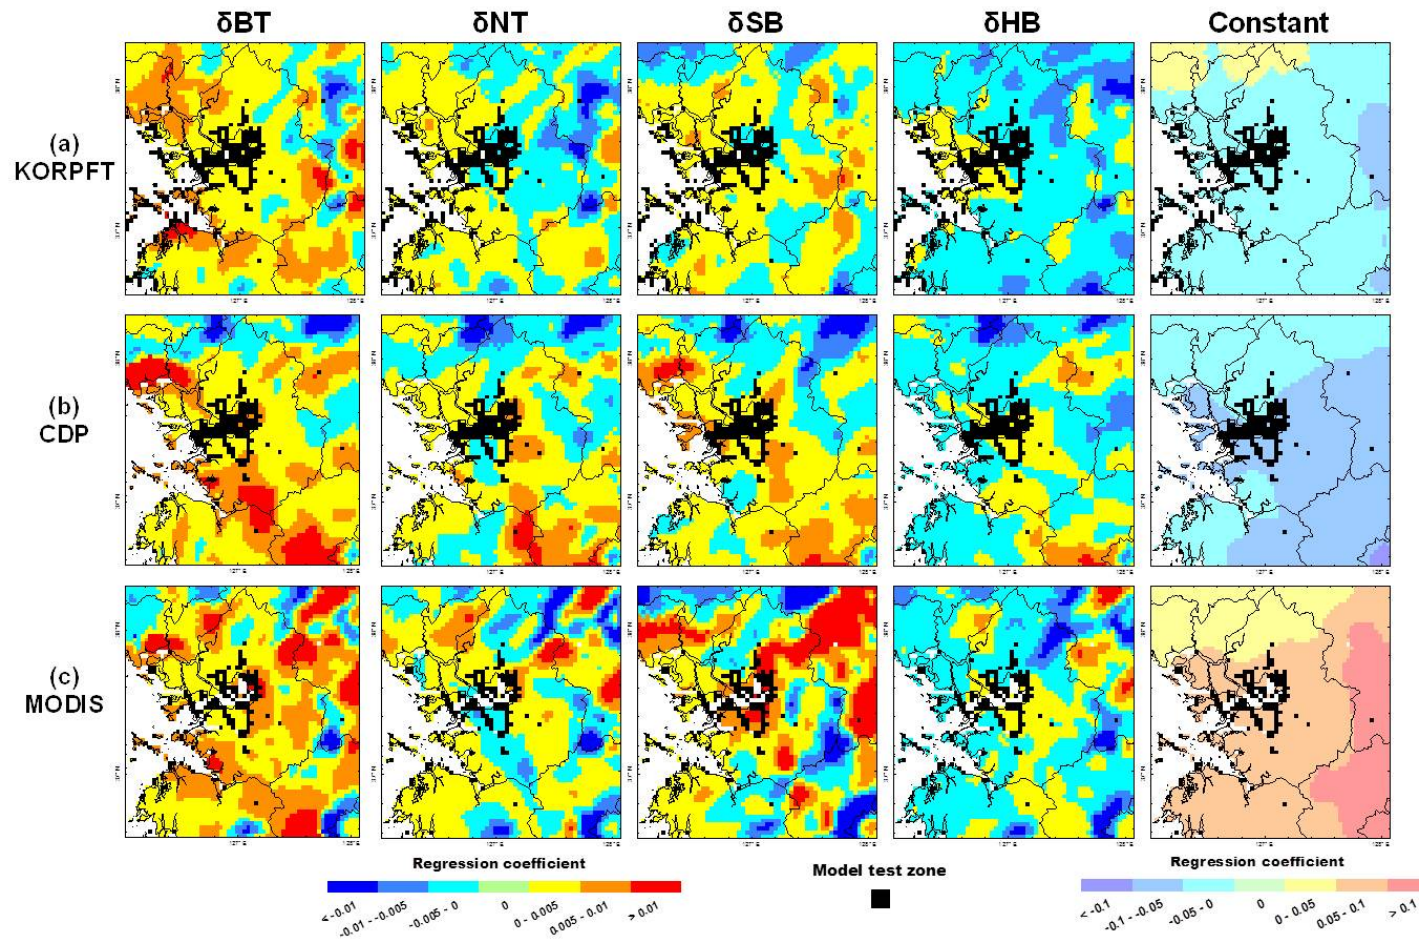

1  
 2 Figure S2. Spatial distribution of the LCR-GWR parameter estimates in the study domain. At the black squared zones the OLS and LCR-  
 3 GWR models were assessed (in Sect 3.5).

1

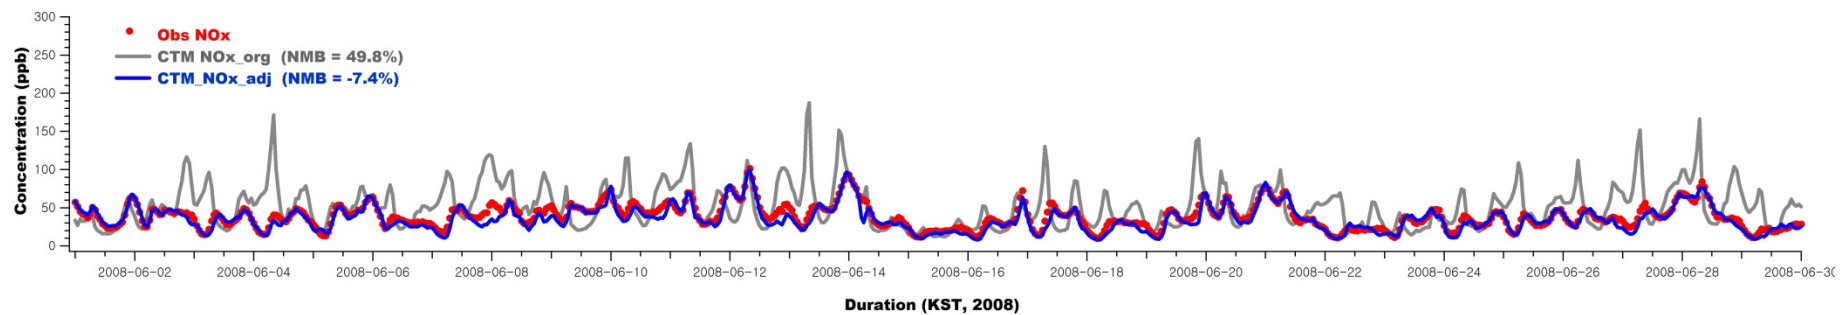

2

3 Figure S3. Time series of NOx concentrations for observation (Obs NOx), CMAQ simulation with original input (CTM\_NOx\_org) and  
4 CMAQ simulation with adjusted inputs (CTM\_NOx\_adj).

5

6

7

8

9

10

11

12

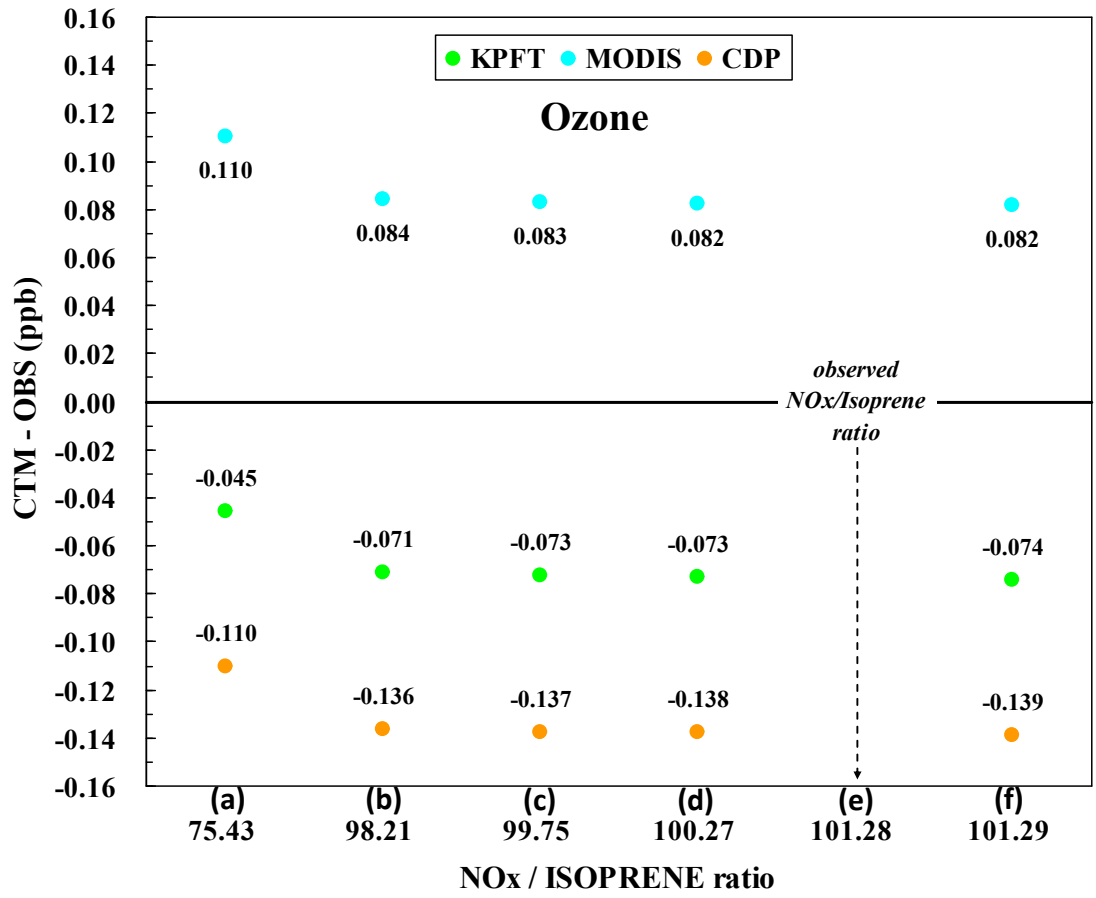

1

2 Figure S4. Change in the mean bias (MB) value of O3 by change in NOx/isoprene ratio.
